# Supplementary material
Source: publisher figshare collection journal article supplement (https://tandf.figshare.com/ndownloader/files/22658648)

## Supporting Information

### **Natural eggshell waste as an eco-friendly and low-cost catalyst for the synthesis of $\alpha$ , $\beta$ -unsaturated compounds**

Hongyuan Yang<sup>#</sup>, Tengfei Zhang<sup>#</sup>, Qing Liu\*

*Key Laboratory of Low Carbon Energy and Chemical Engineering, College of Chemical and Environmental Engineering, Shandong University of Science and Technology, Qingdao Shandong 266590, China*

\*Corresponding author. E-mail address: qliu@sdust.edu.cn (Q. Liu)

<sup>#</sup>These authors contributed equally to this work.

## Experimental

### Materials and methods

#### Chemicals

Three natural eggshells were collected from the restaurant, which were washed by deionized water to remove the soluble impurities and keratin. After being dried at 80 °C for 24 h, it was crushed using universal grinder with the size smaller than 48  $\mu\text{m}$ . All others chemicals with analytical grade were purchased from Shanghai Macklin Biochemical Co., Ltd, China, and used without further treatment.

#### Characterizations

Rigaku Ultima IV (Rigaku Corporation, Osaka, Japan) was used to record the X-ray diffraction (XRD) patterns with a step of 0.02 using Cu  $K_{\alpha}$  radiation ( $\lambda=1.5418 \text{ \AA}$ ) at 40 kV and 40 mA. PANalytical Axios (MAX) energy dispersive X-ray fluorescence spectrometer (XRF) was used to analyze the elemental composition of the eggshell waste. Nicolet 380 Fourier Transform-Infrared (FT-IR) spectrophotometer (Thermo Electron Corporation, USA) was used to record the FT-IR spectra in the range of 500–4000  $\text{cm}^{-1}$ . Scanning electron microscope (SEM) (JSM-6700F, JEOL) was used to observe the morphology of the eggshell waste. Hammett indicator method was used to measure the basicity strength ( $H_{\text{L}}$ ) of the eggshell waste catalyst using bromothymol blue ( $H_{\text{L}} = 7.2$ ), phenolphthalein ( $H_{\text{L}} = 9.8$ ) and dinitroaniline ( $H_{\text{L}} = 15.0$ ) as Hammett indicators. Melting points and  $^1\text{H}$  NMR spectra were determined on a XT-4 micromelting point apparatus (Beijing Taike Instrument Company, China) and EFT-60 NMR spectrometer (Anasazi Instruments, USA), respectively.

Compound 1

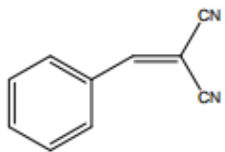

7.947  
7.932

7.810

7.680  
7.665  
7.650

7.589  
7.573  
7.558

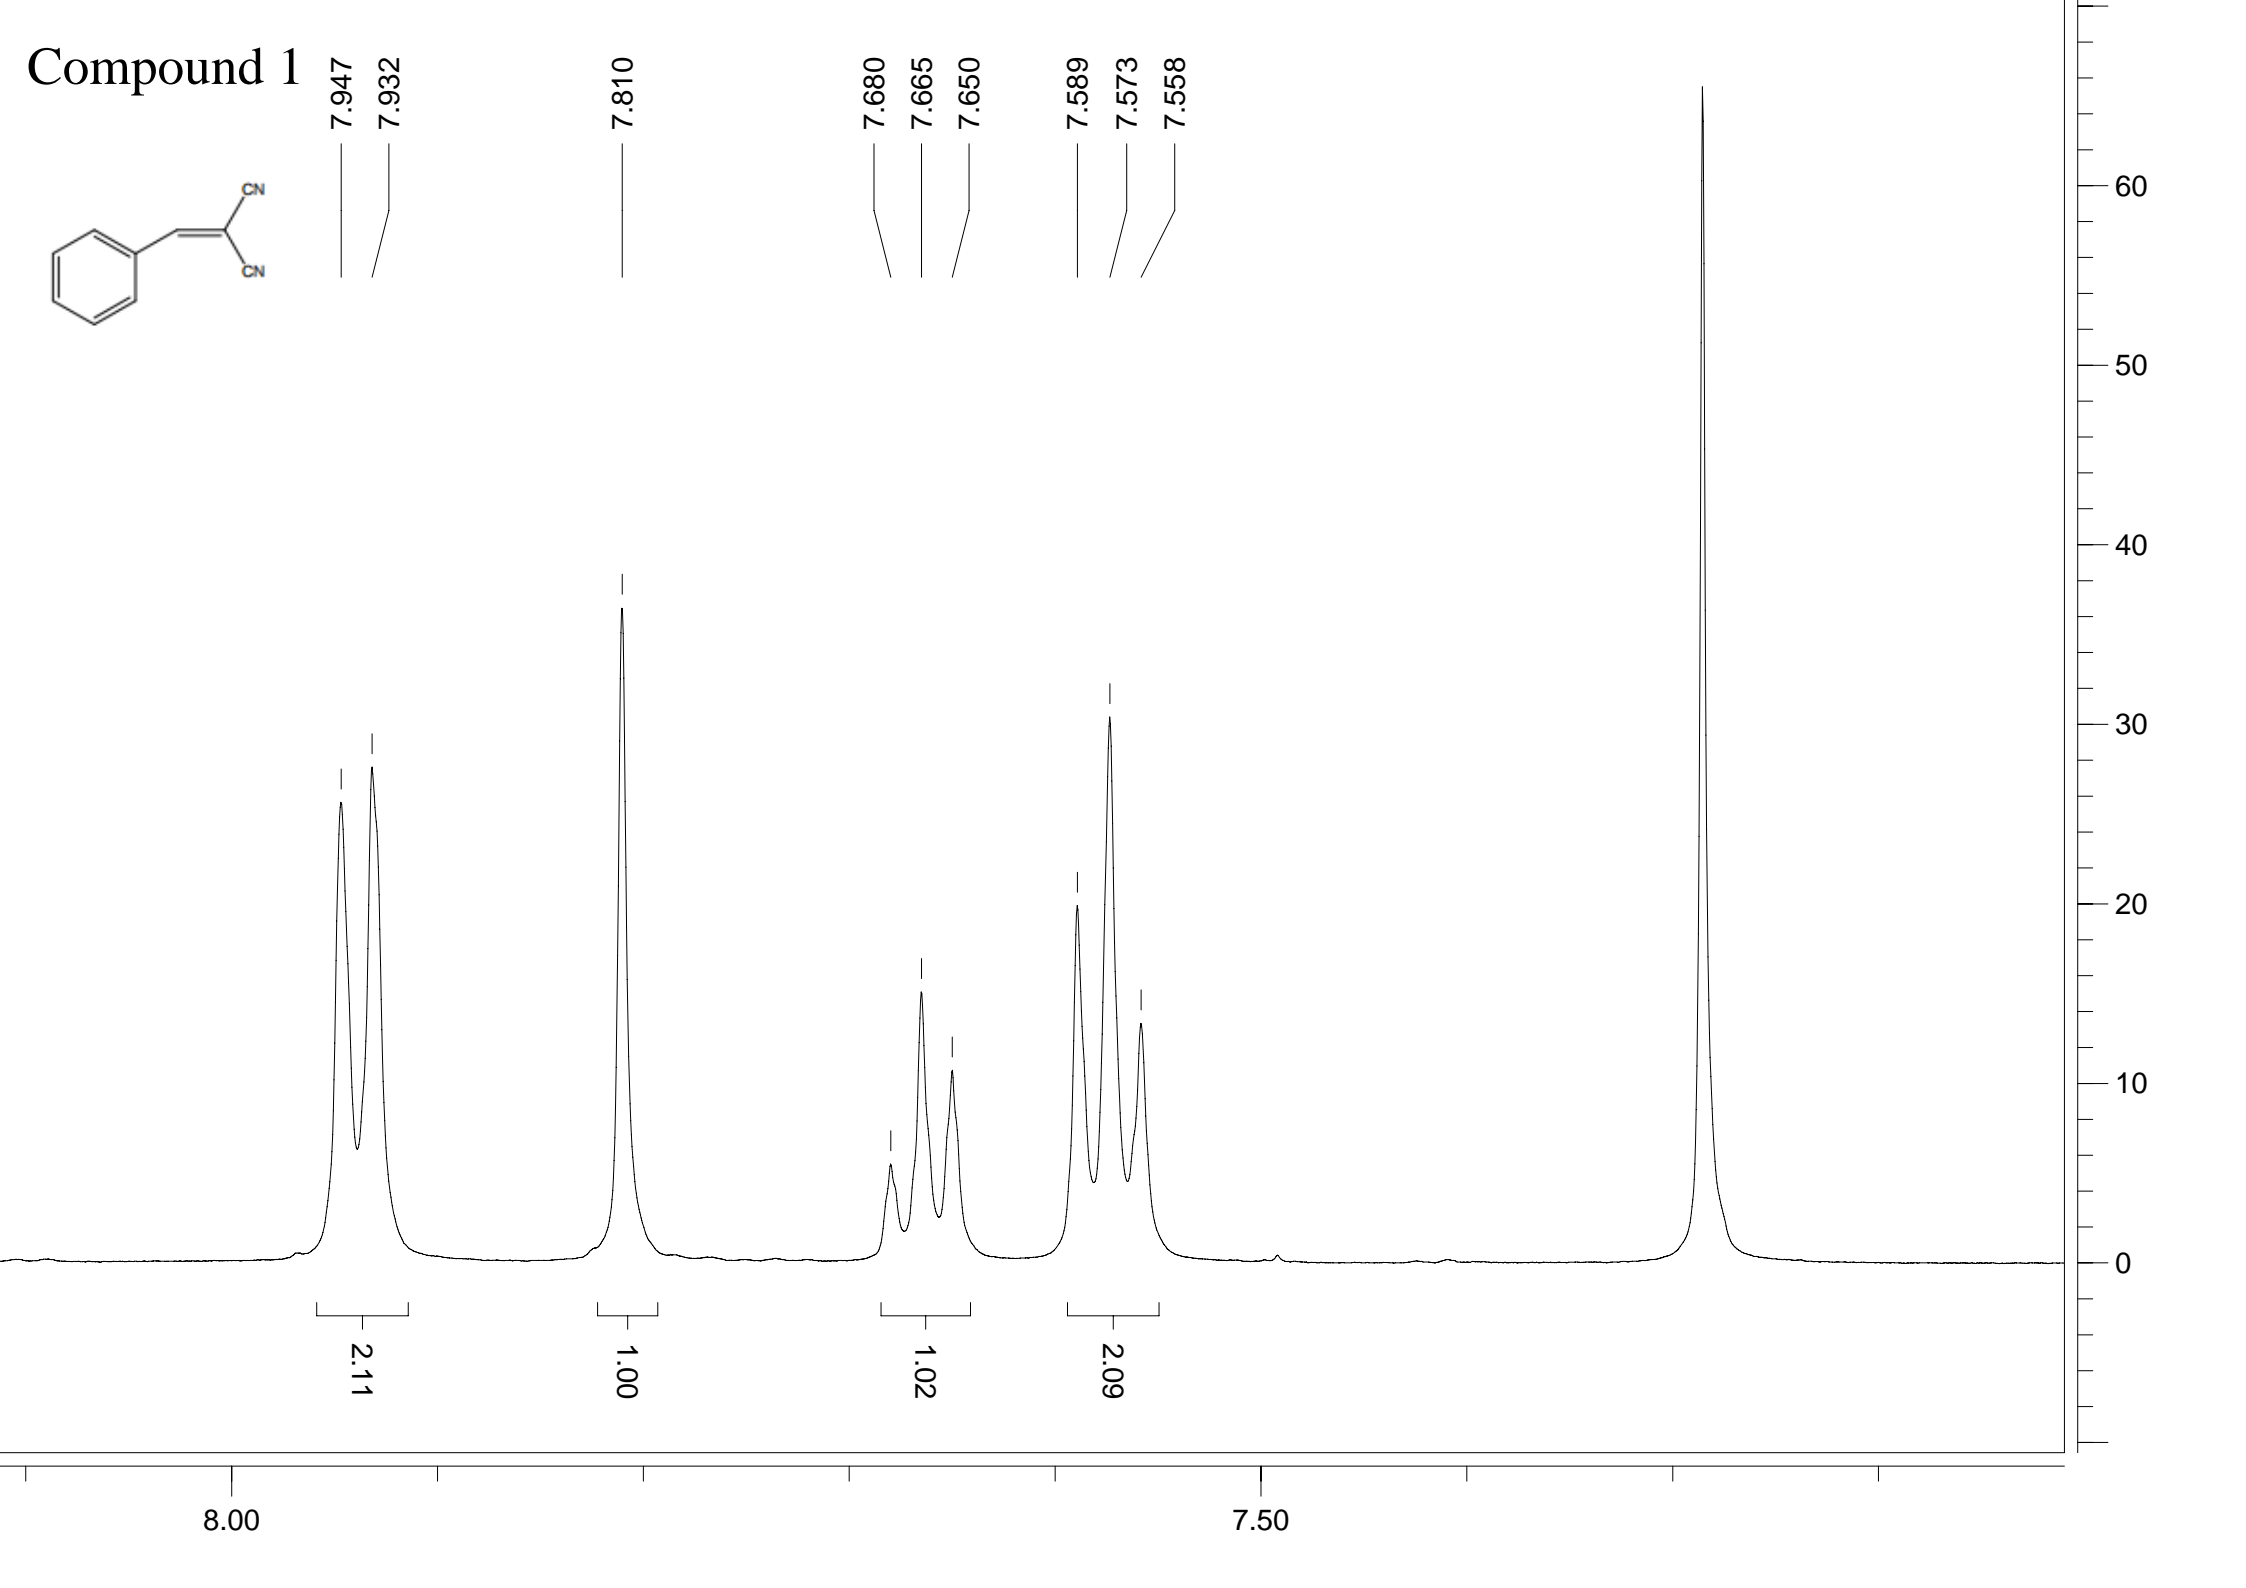

# Compound 2

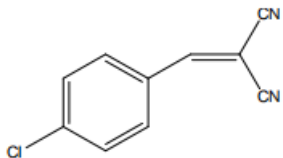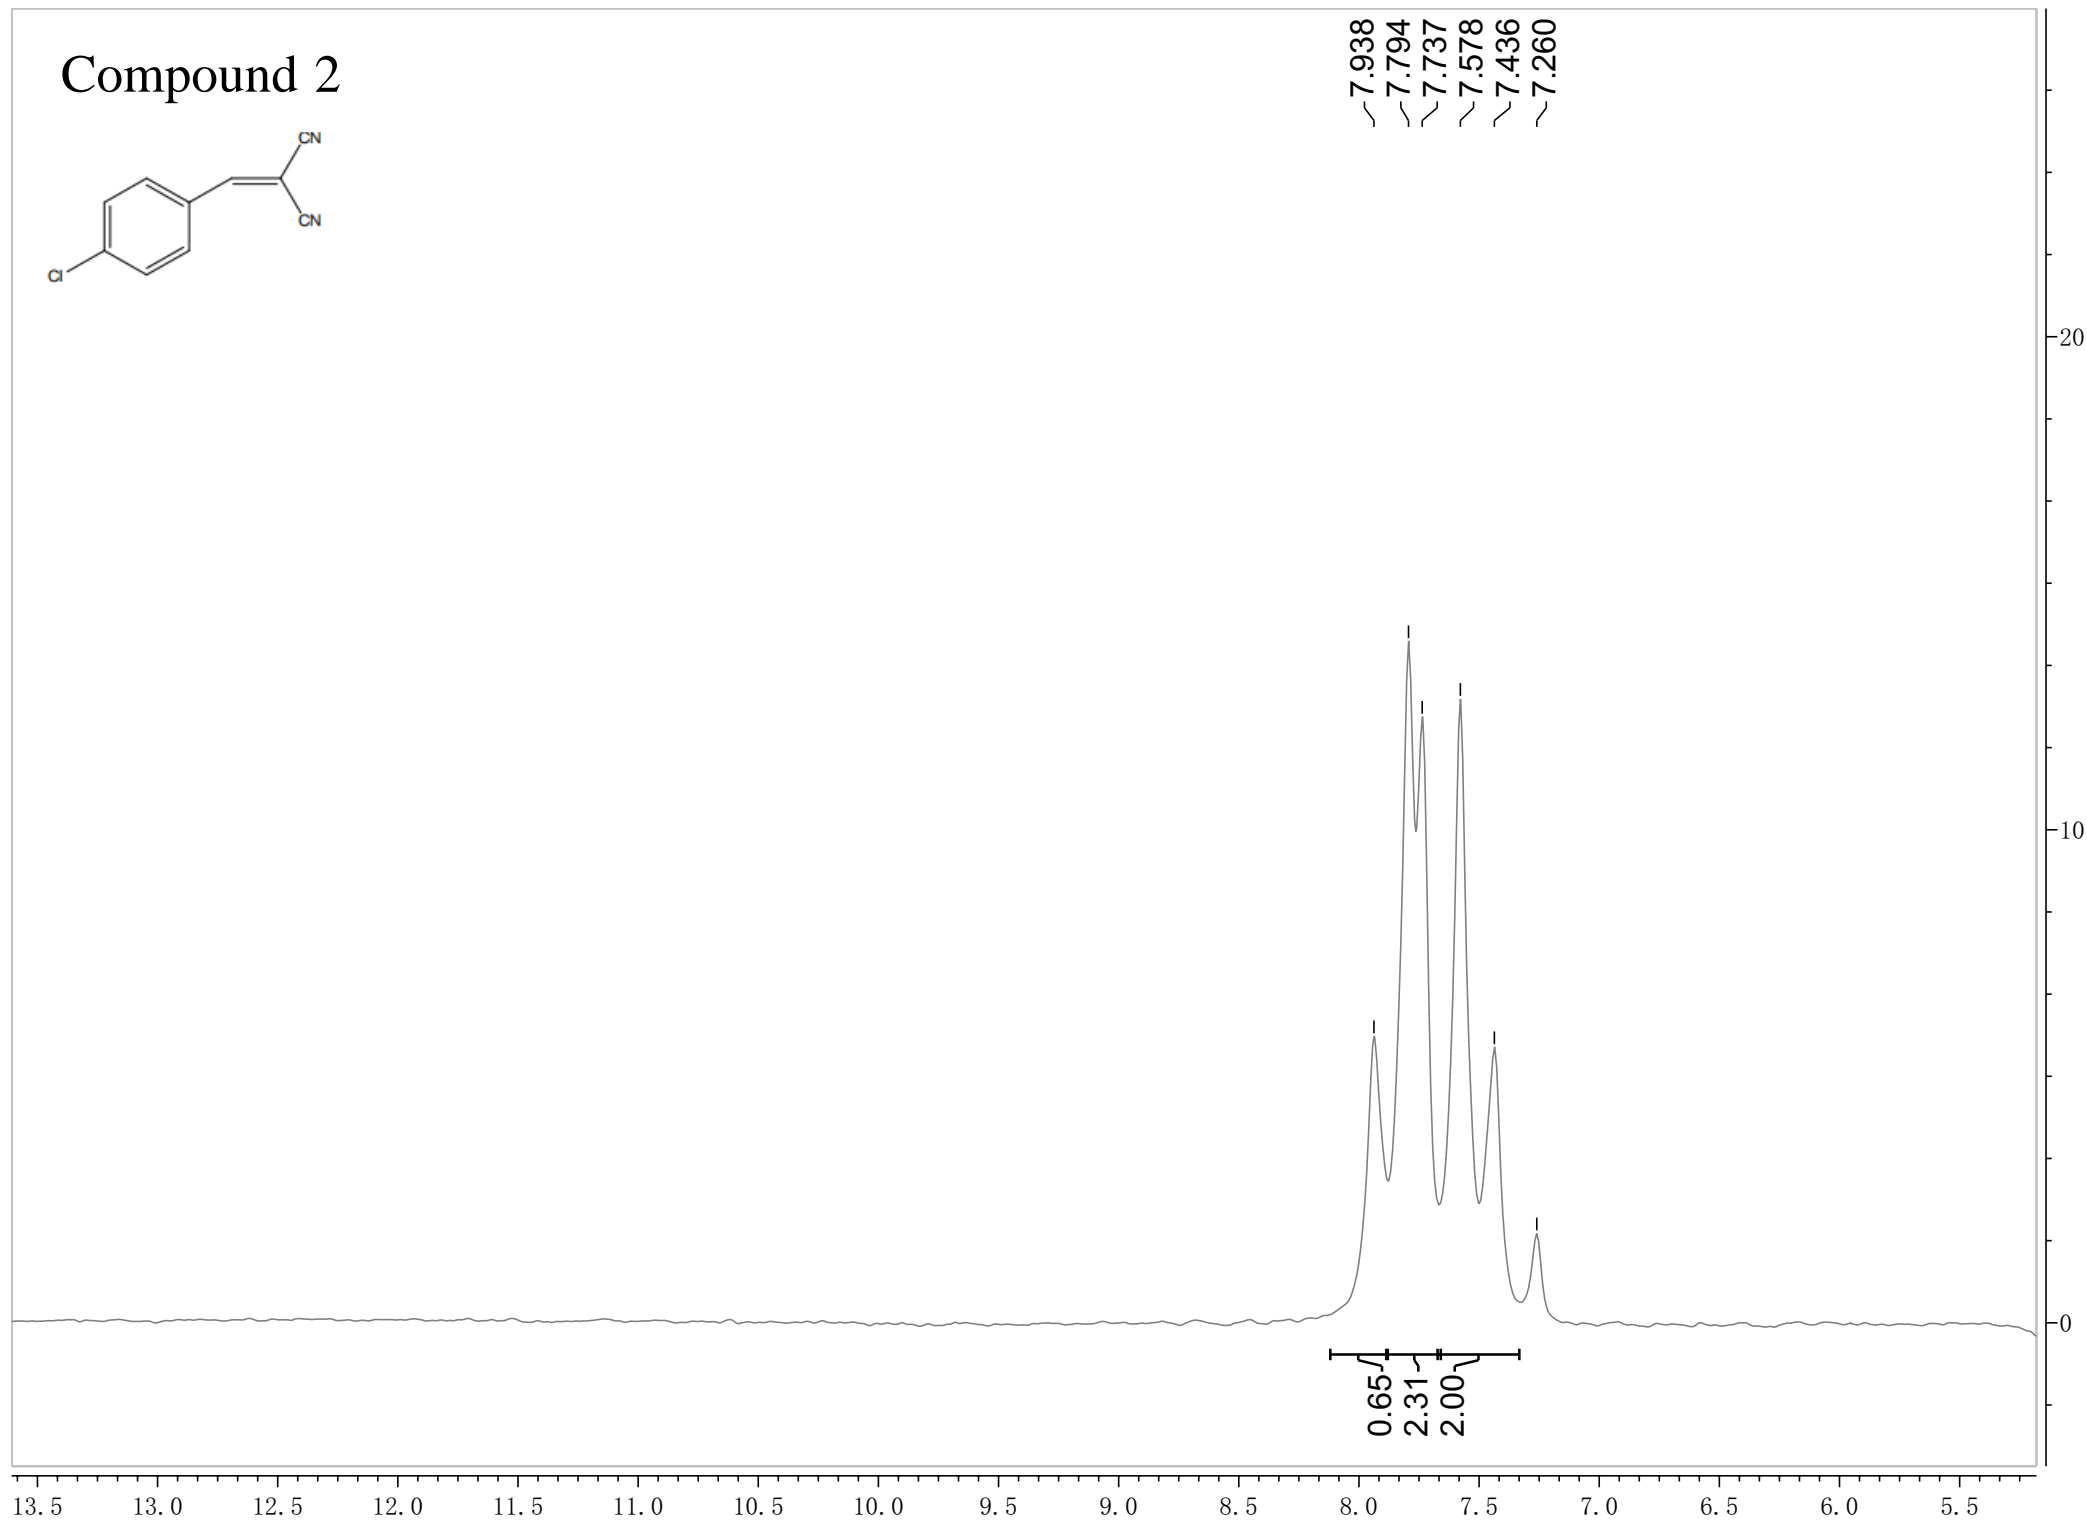

# Compound 3

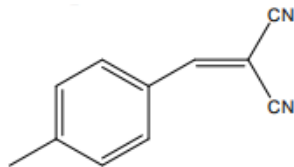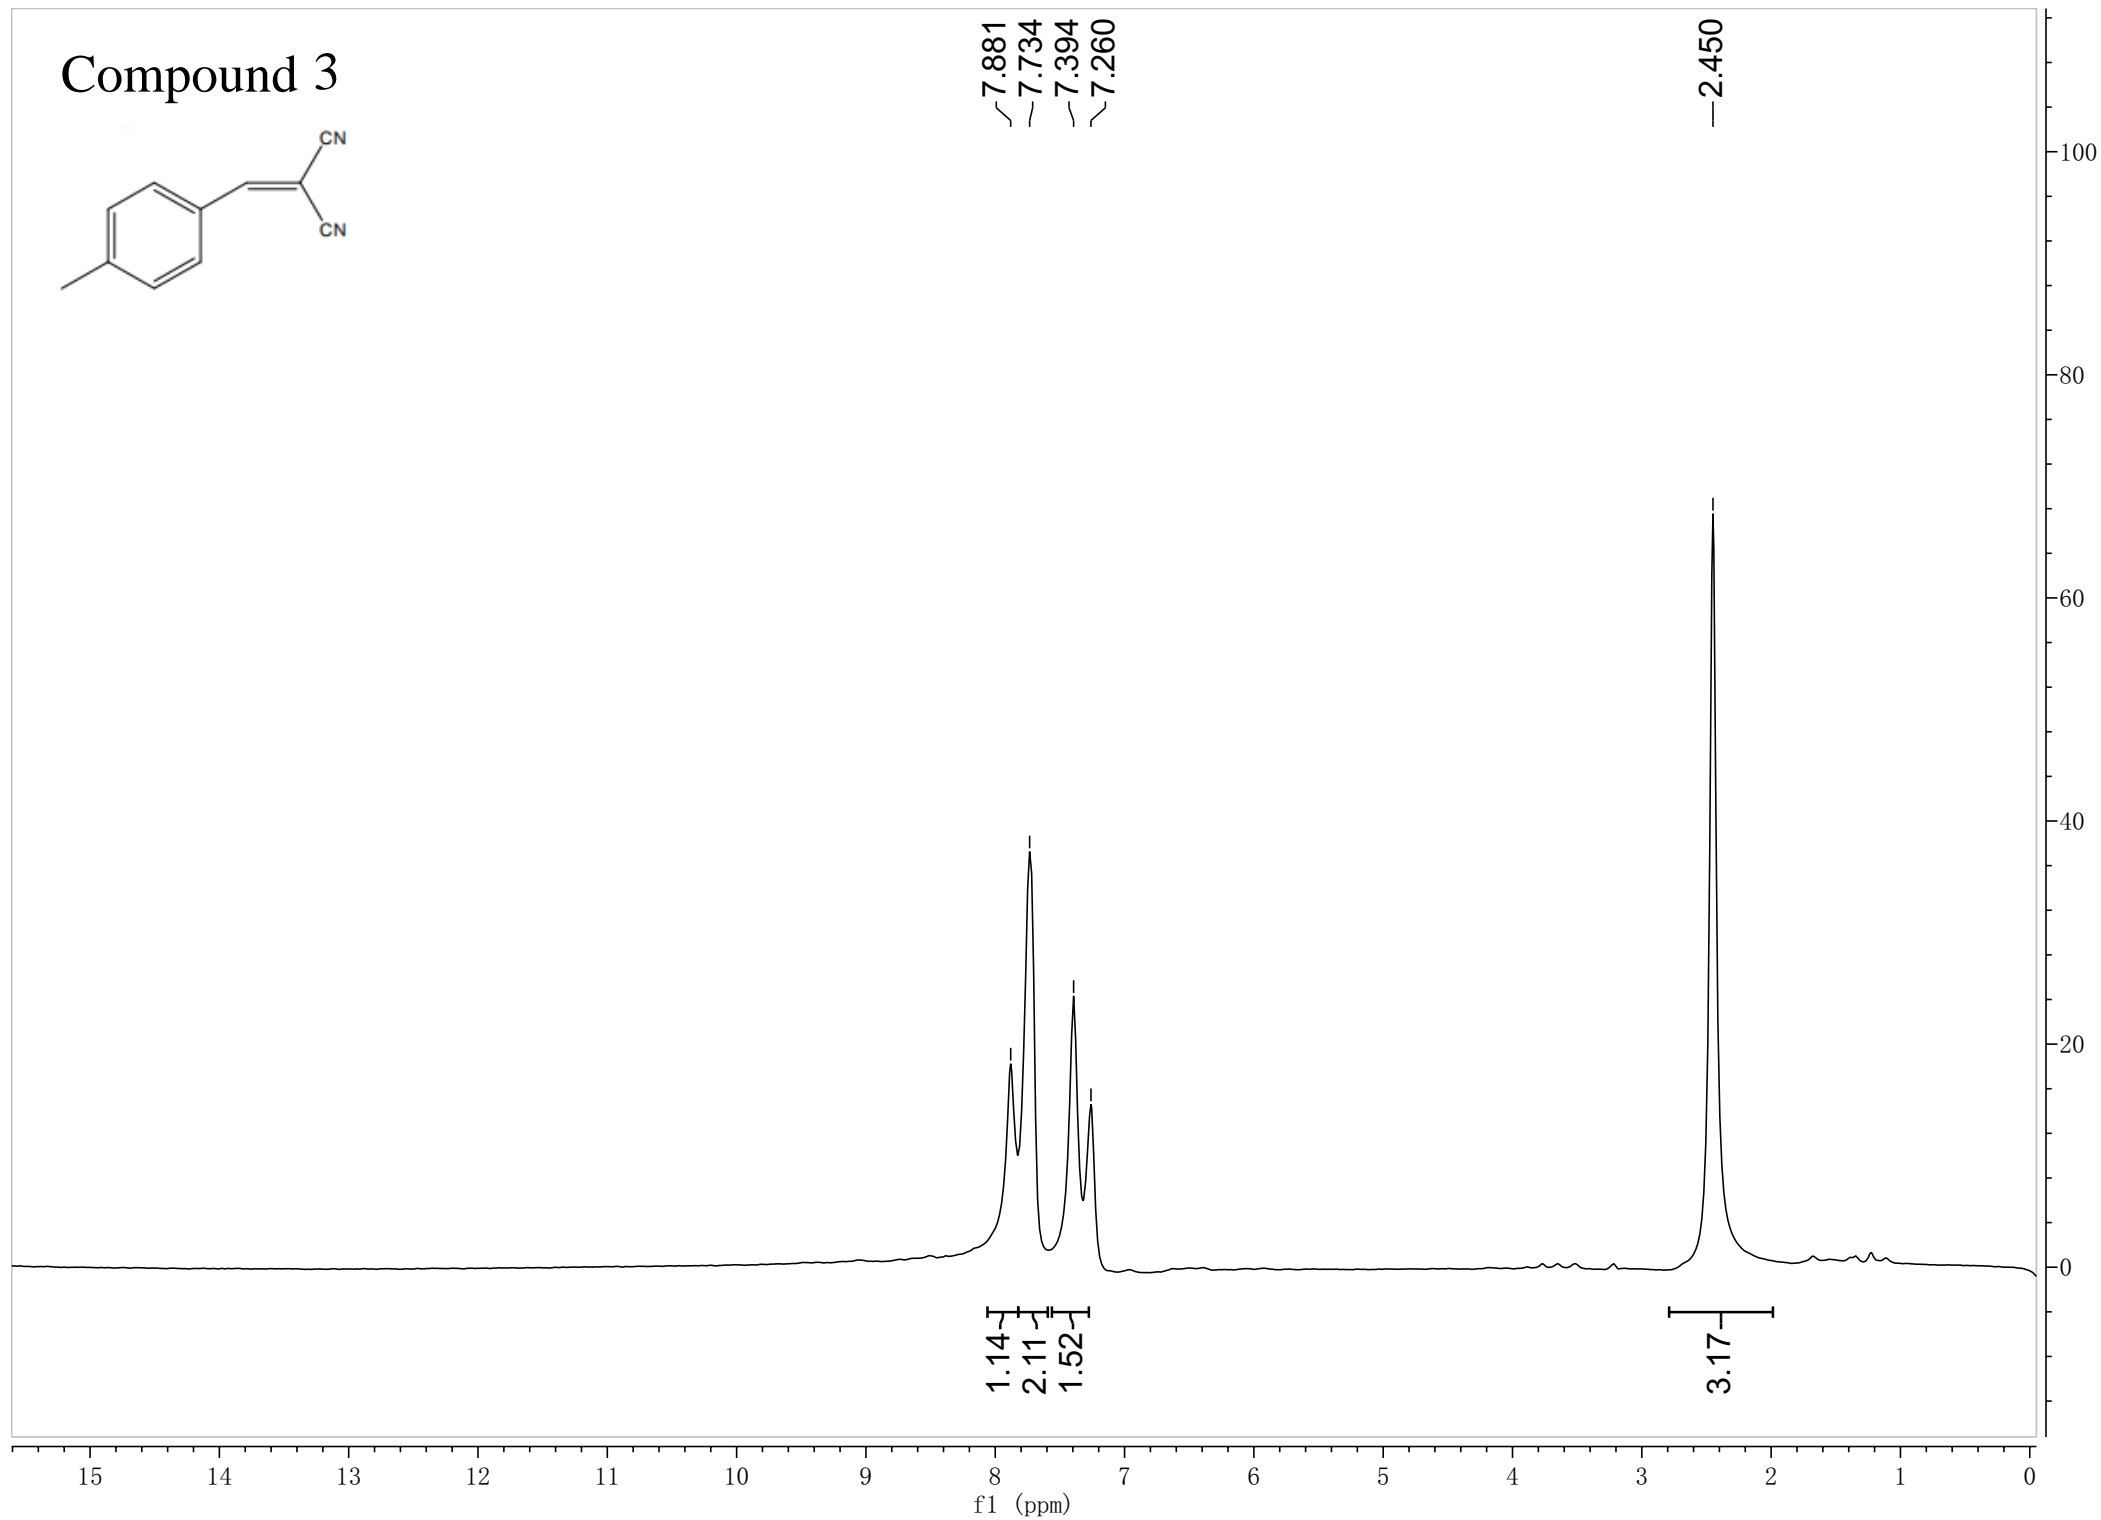

# Compound 4

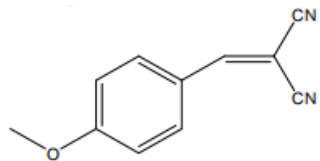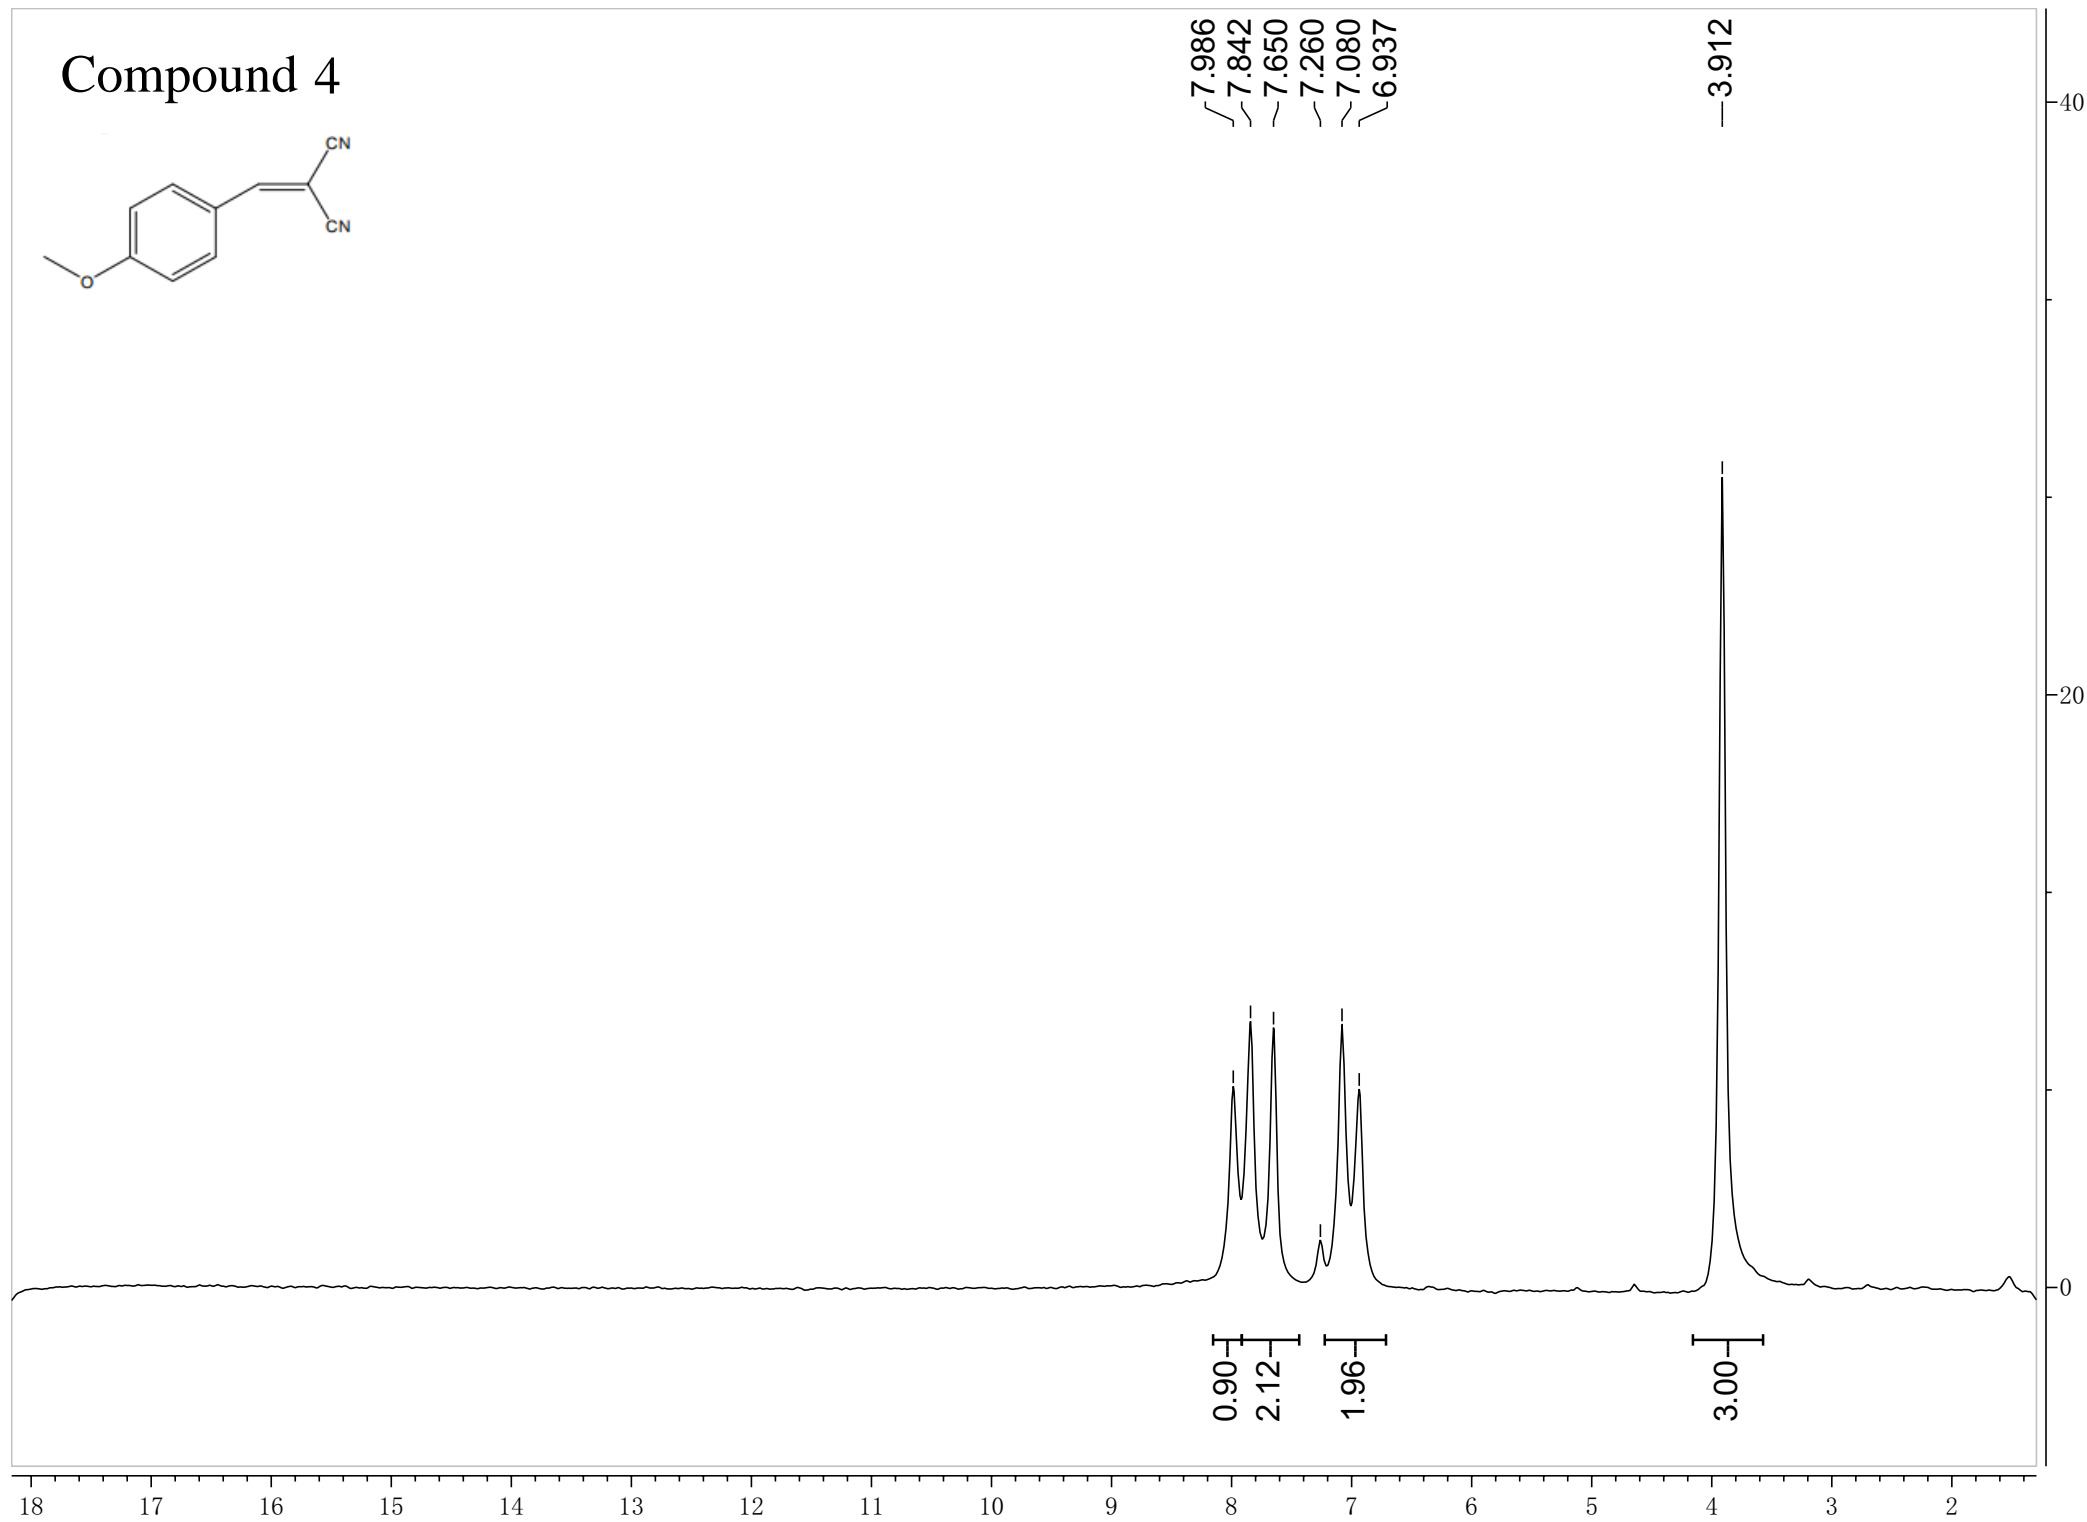

# Compound 5

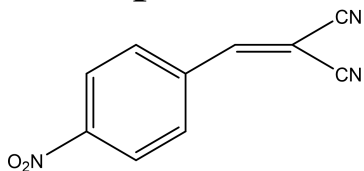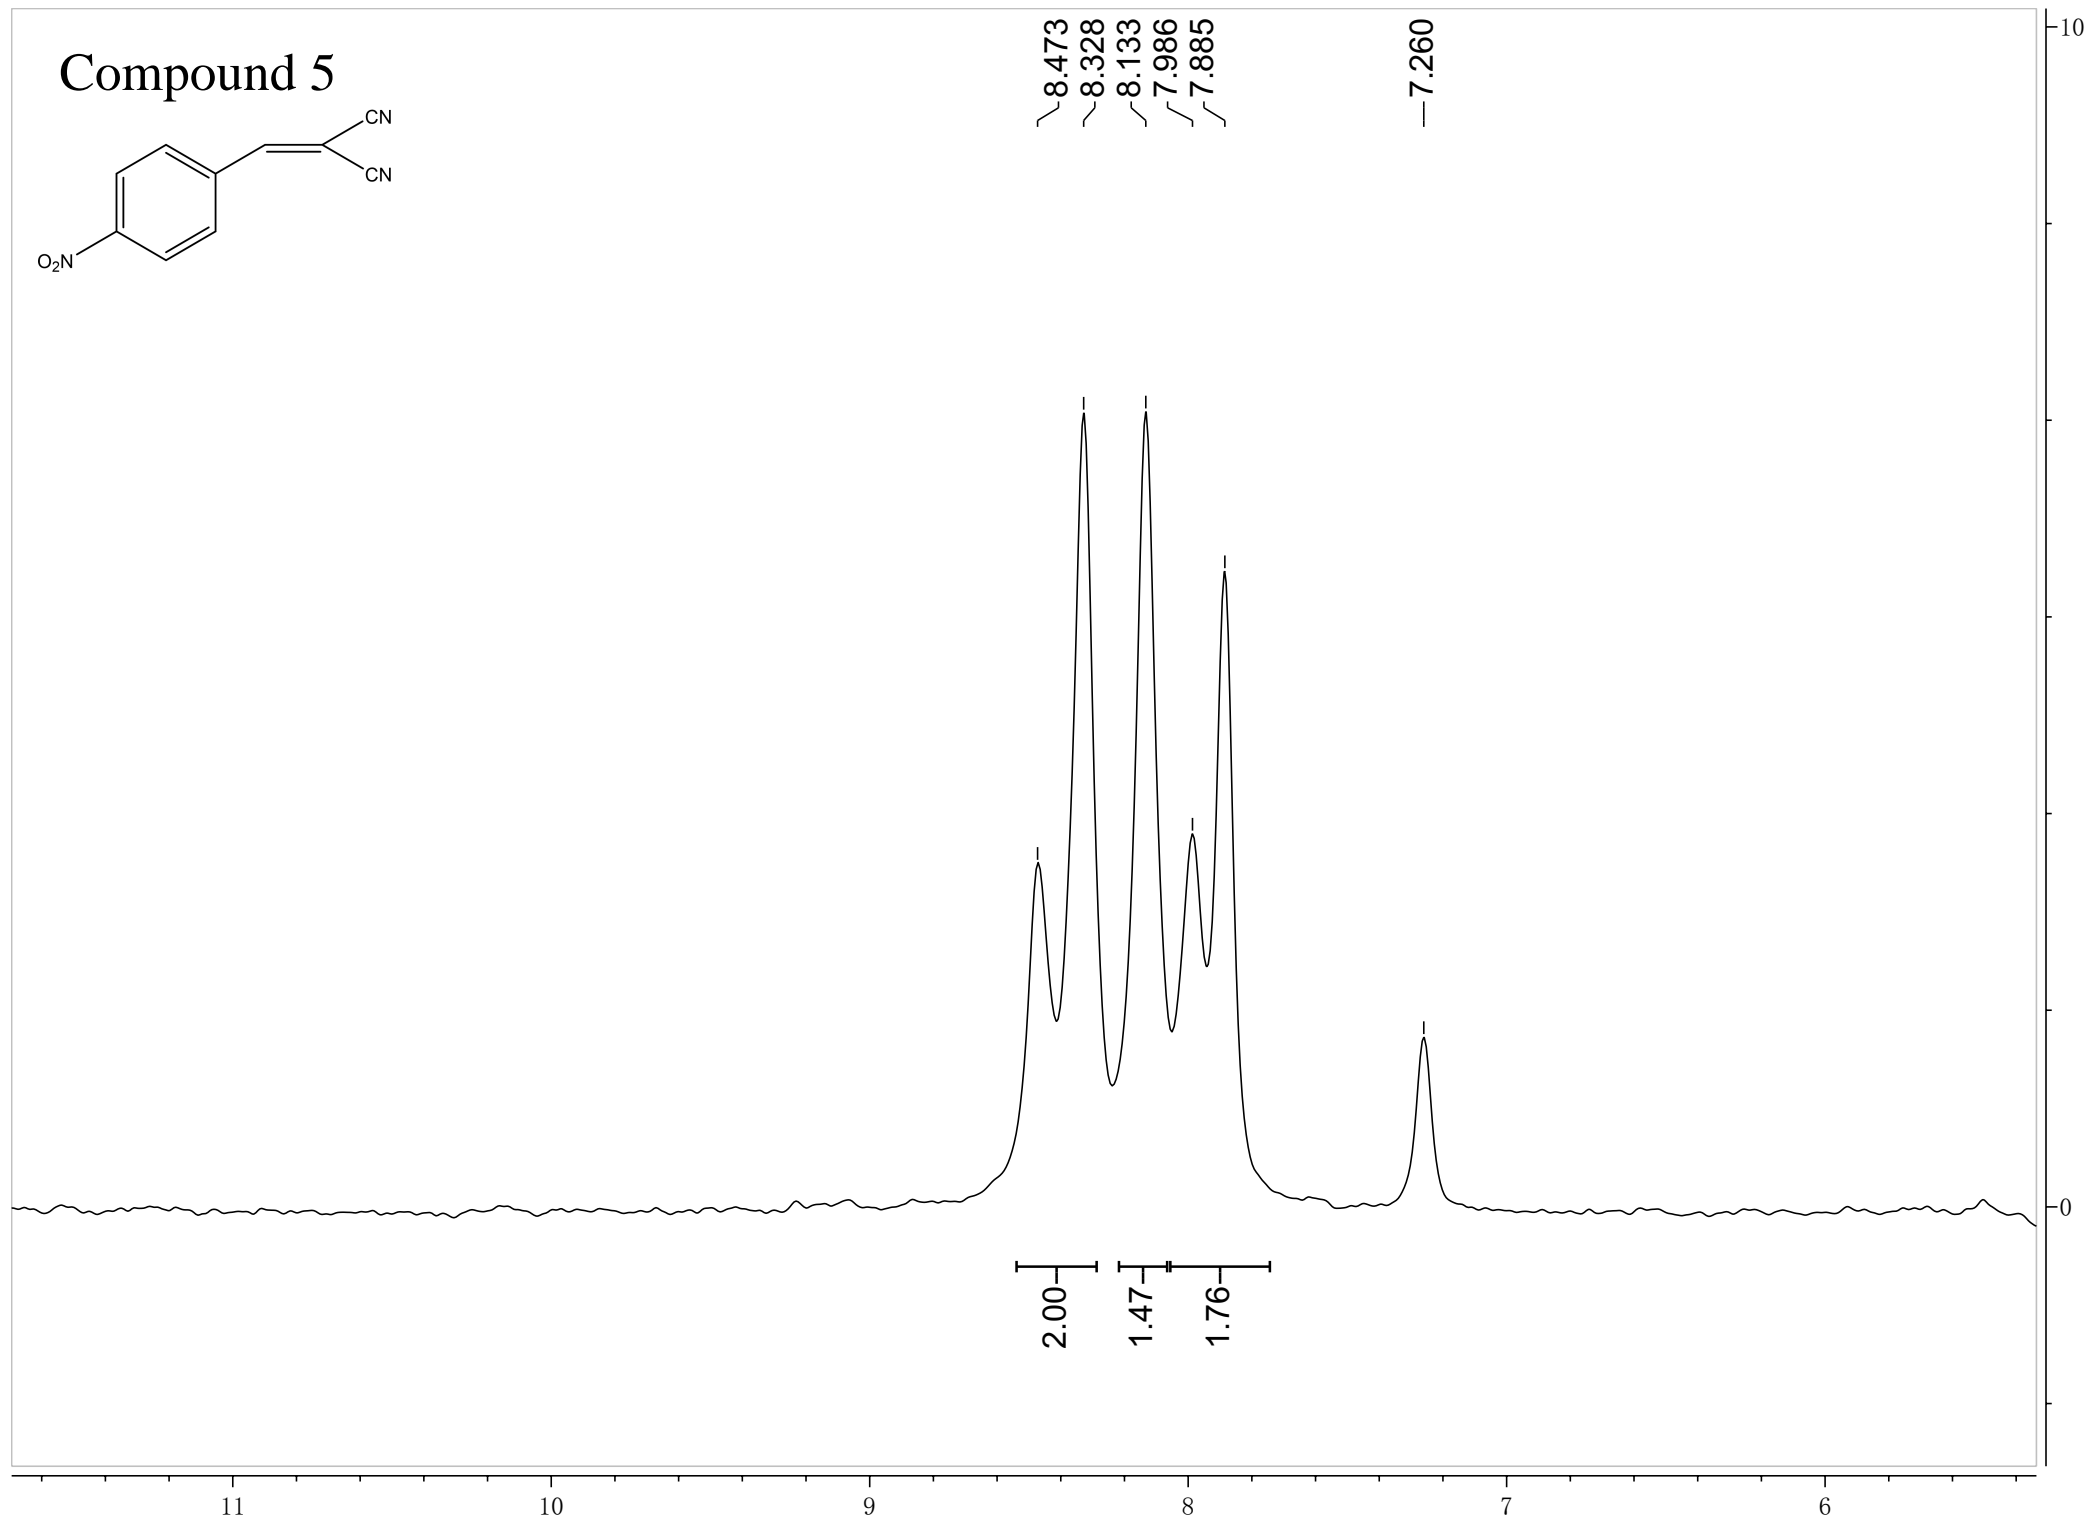

# Compound 7

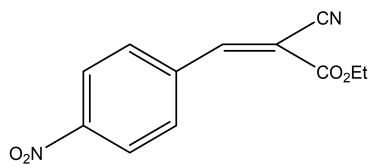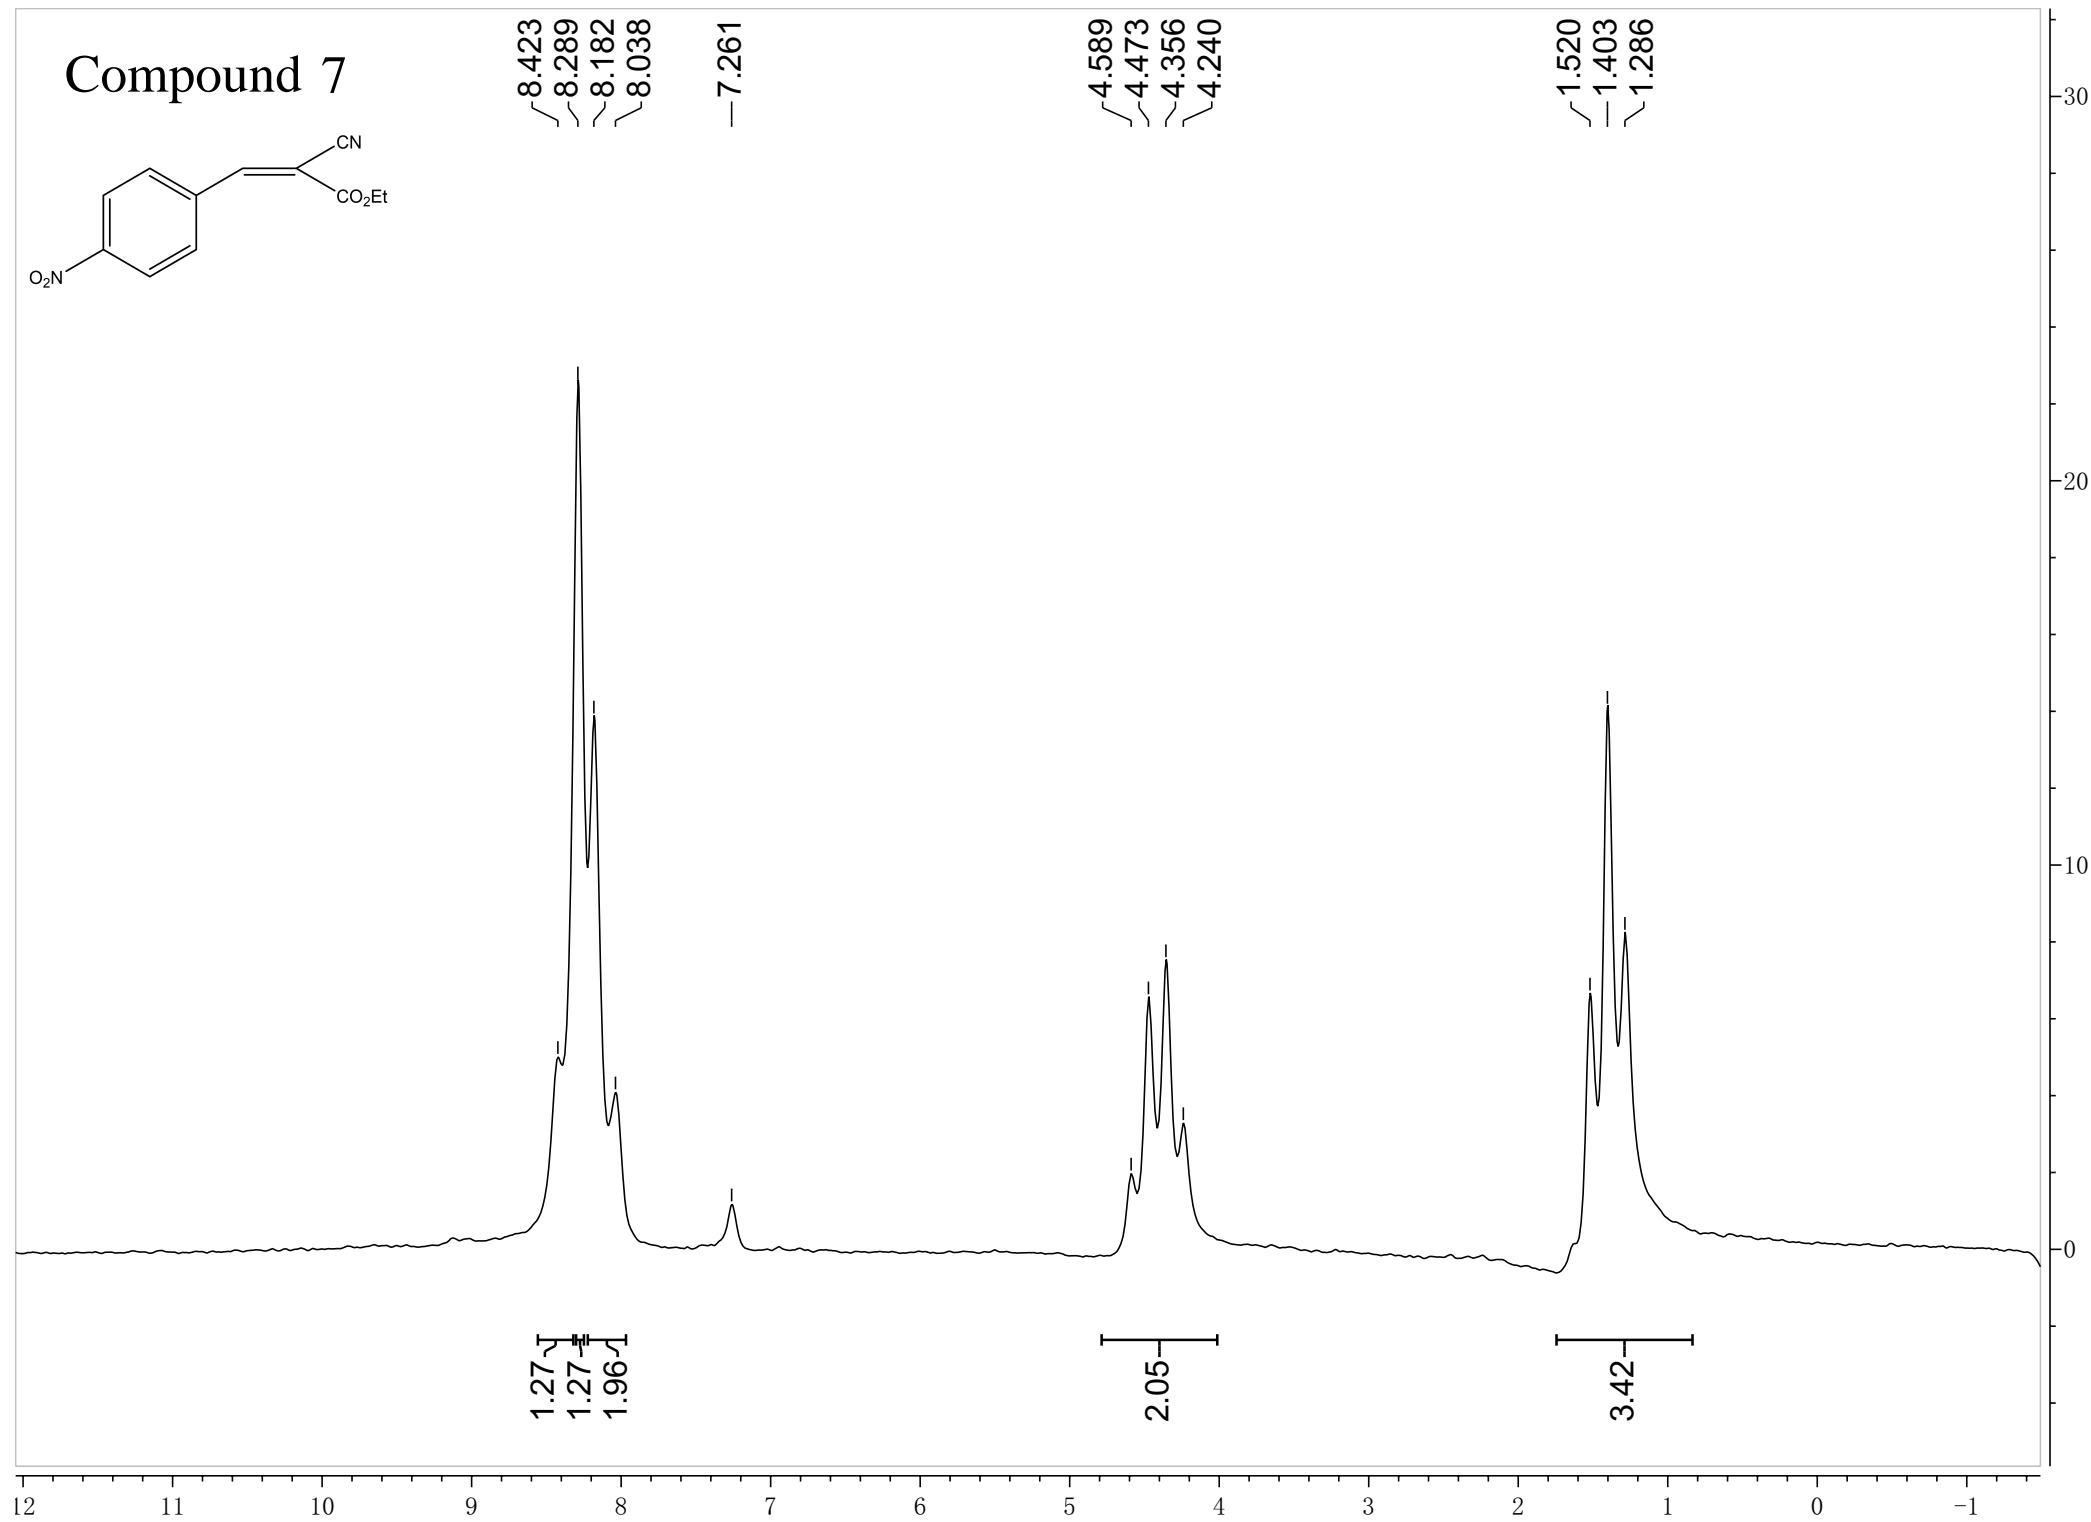



# Compound 8

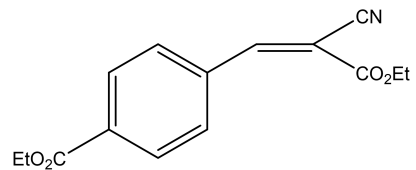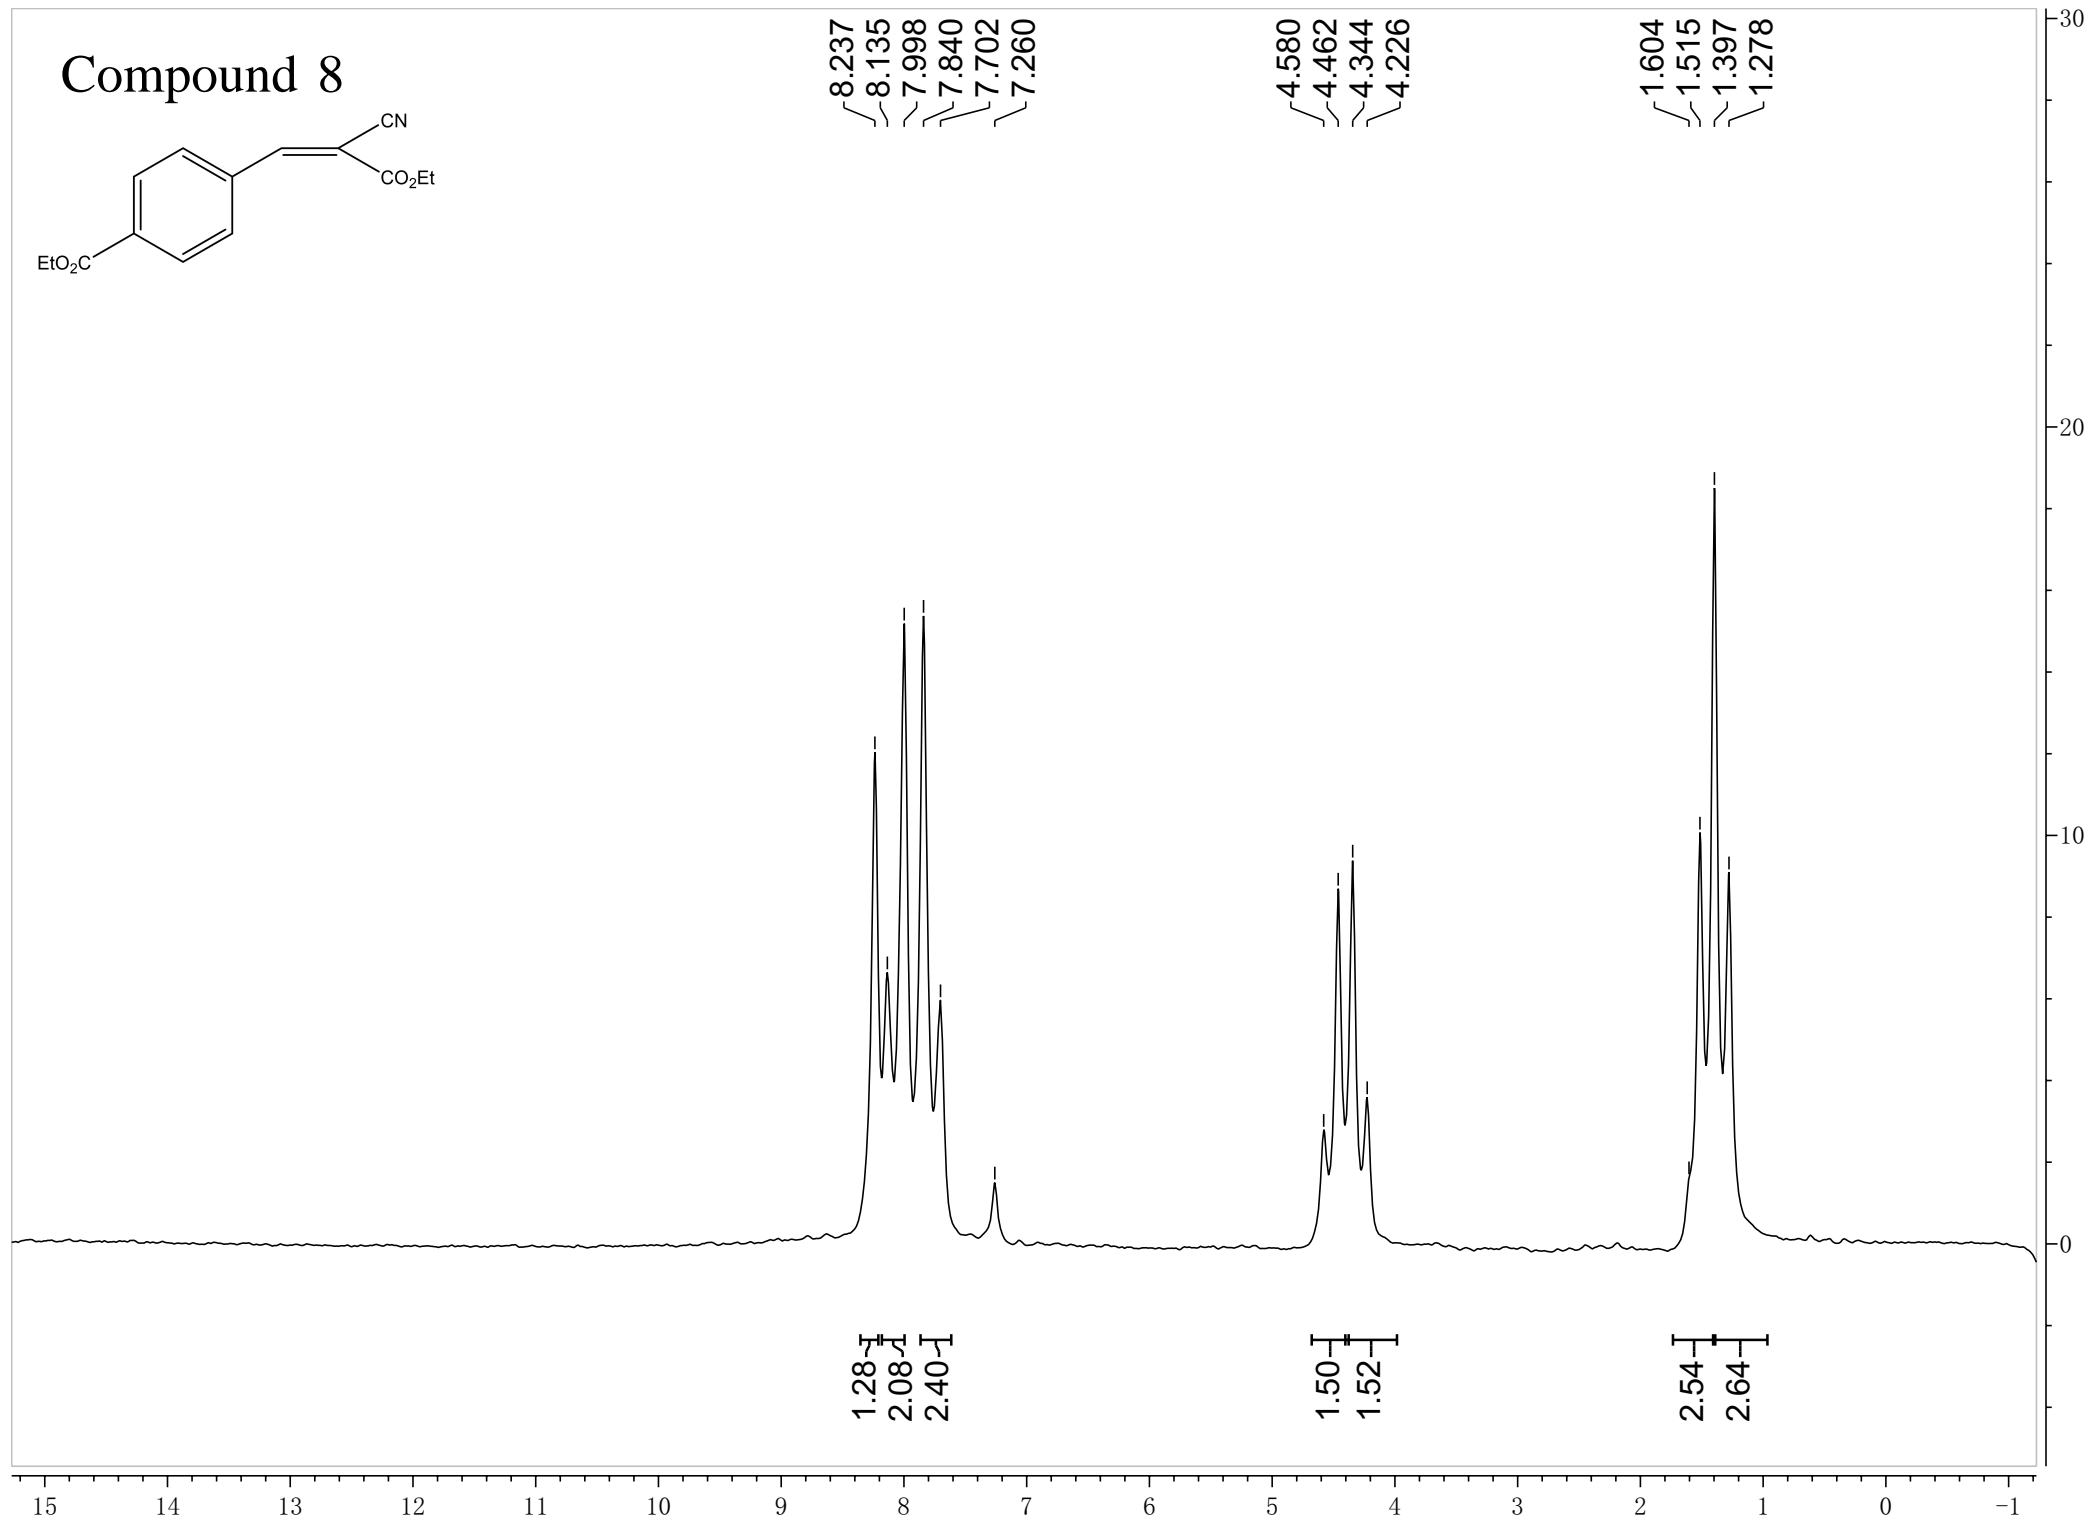

Supplement: Supplementary file 1 [file 22658648]
